# Supplementary material for: Genome-wide analysis yields new loci associating with aortic valve stenosis
Source: PubMed Central journal article supplement (PMC5840367; doi:10.1038/s41467-018-03252-6), 2018-03-07
Supplement: 41467_2018_3252_MOESM1_ESM.pdf [file 41467_2018_3252_MOESM1_ESM.pdf]

## Supplementary Information

Genome-wide analysis yields new loci associating with aortic valve stenosis

Helgadottir, *et.al.*

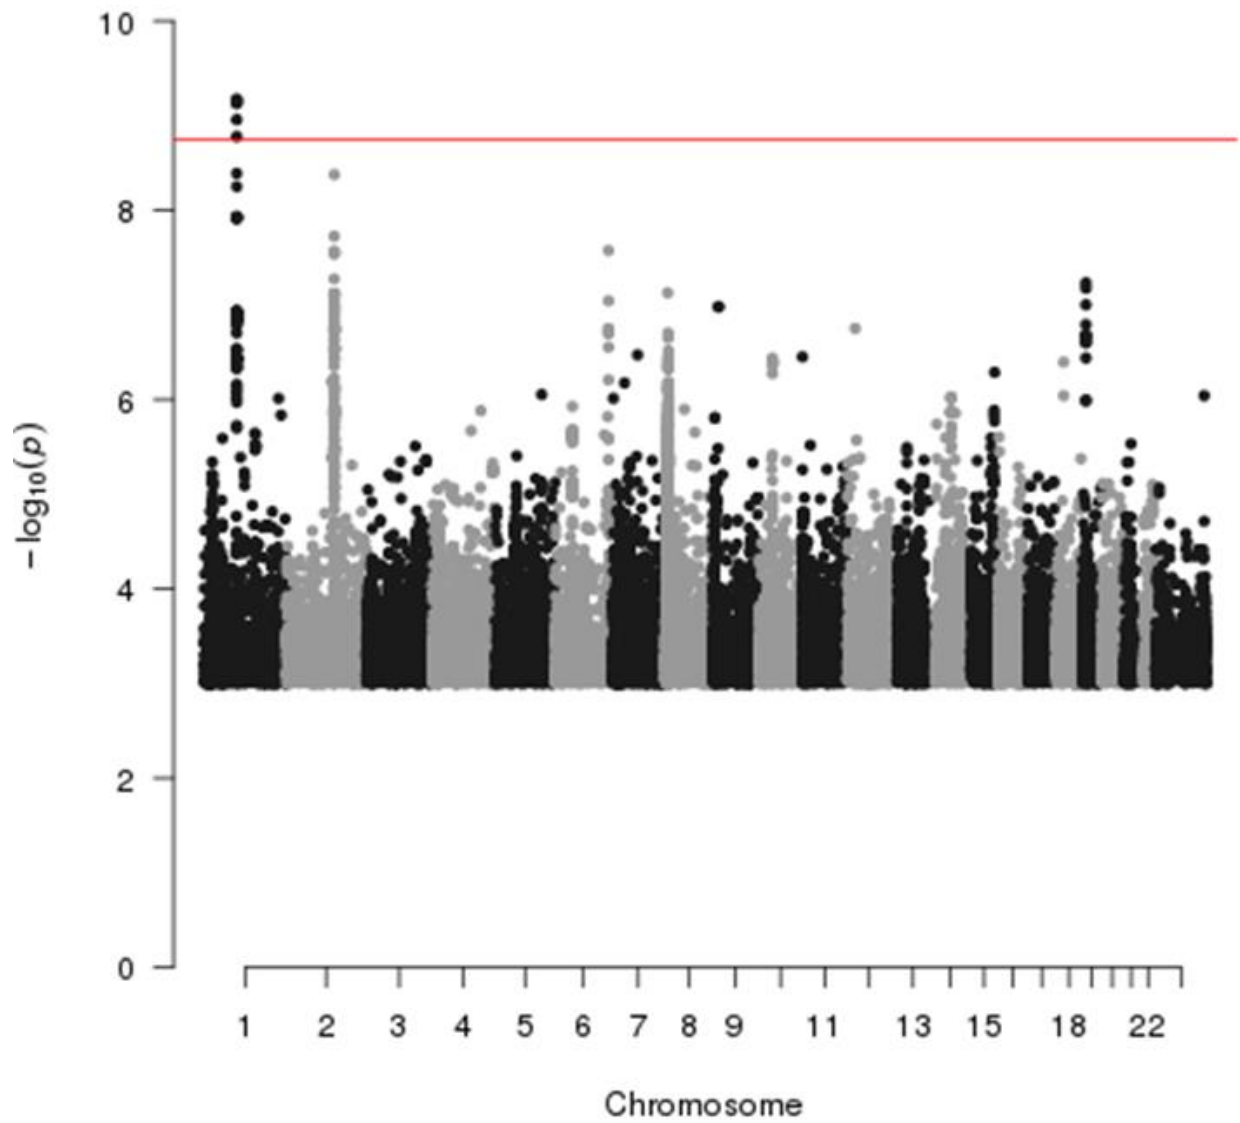

**Supplementary Fig. 1**

Manhattan plot for the discovery genome-wide association analysis. The red horizontal line indicates the genome-wide significance threshold for low-impact variants ( $P < 4.6 \times 10^{-9}$ ).

Left-ventricle

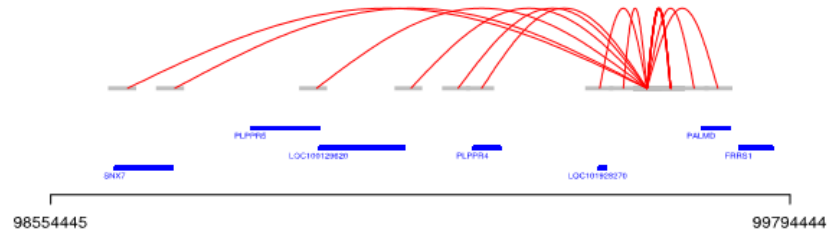

Left-ventricle

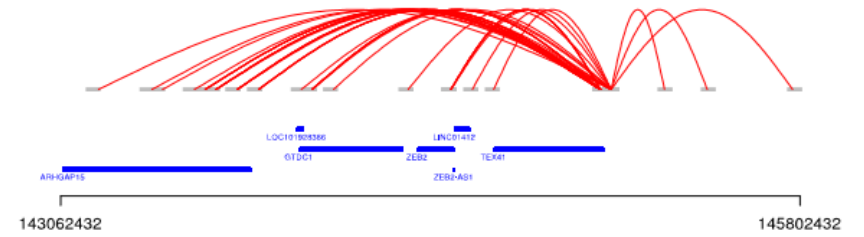

Aorta

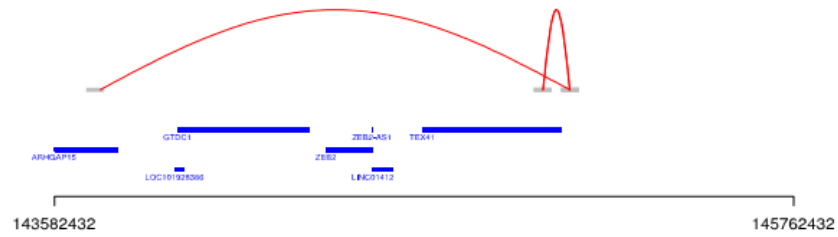

Aorta

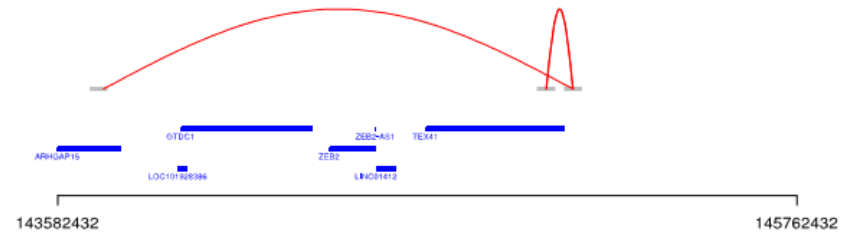

Right ventricle

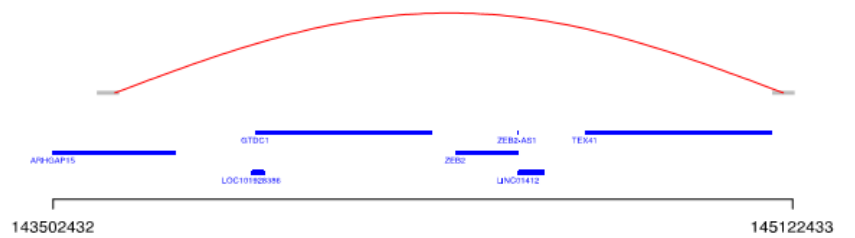

## **Supplementary Fig. 2**

Shown are all chromatin interactions observed for the regulatory regions, to which AS risk variants at the *PALMD* locus (on the left-hand side) and at the *TEX41* locus (on the right-hand side) map to.

The chromatin interactions are shown for left- and right ventricular heart, and aorta tissue samples.

At the *PALMD* locus no chromatin interactions were observed in right ventricular tissue.
