# Supplementary material for: Genome-wide analysis yields new loci associating with aortic valve stenosis
Source: PubMed Central journal article supplement (PMC5840367; doi:10.1038/s41467-018-03252-6), 2018-03-07
Supplement: 41467_2018_3252_MOESM3_ESM.pdf [file 41467_2018_3252_MOESM3_ESM.pdf]

## **Description of Supplementary Files**

File Name: Supplementary Data 1

Description: Replication of variants with suggestive association with aortic stenosis in Iceland.

File Name: Supplementary Data 2

Description: Association of aortic stenosis variants with other cardiovascular phenotypes.

File Name: Supplementary Data 3

Description: Association of aortic stenosis variants with traditional cardiovascular risk factors.

File Name: Supplementary Data 4

Description: The effect of established coronary artery disease (CAD) variants on CAD and aortic valve stenosis (AS).

File Name: Supplementary Data 5

Description: The effect of established coronary artery disease (CAD) variants on aortic valve stenosis (AS) in Iceland and UK-Biobank.

File Name: Supplementary Data 6

Description: The association of CAD genetic risk score with aortic valve stenosis.

File Name: Supplementary Data 7

Description: Association of reported aortic root size variants on aortic valve stenosis.
